# Supplementary material for: What determines the values of environmental benefits? Evidence from a worldwide survey
Source: Research Square preprint supplement (doi:10.21203/rs.3.rs-838391/v1), 2021-09-24
Supplement: Supplementary file 1 [file 88f2725290011b9e6628bd48.pdf]

**Table 1 | Characteristics of each preference group**

|                                            |                       | (a) All countries<br>(19 countries) |      |      |      | (b) Middle-income countries<br>(9 countries) |      |      |      | (c) High-income countries<br>(10 countries) |      |      |
|--------------------------------------------|-----------------------|-------------------------------------|------|------|------|----------------------------------------------|------|------|------|---------------------------------------------|------|------|
| Class ➡                                    |                       | A1                                  | A2   | A3   | A4   | M1                                           | M2   | M3   | M4   | H1                                          | H2   | H3   |
| Share of the sample ➡                      |                       | 48%                                 | 23%  | 22%  | 8%   | 20%                                          | 39%  | 37%  | 5%   | 10%                                         | 30%  | 60%  |
| WF1<br>(normalized<br>social<br>weighting) | Human health          | 0.13                                | 0.61 | 0.26 | 0.42 | 0.22                                         | 0.19 | 0.54 | 0.53 | 0.38                                        | 0.52 | 0.14 |
|                                            | Social assets         | 0.17                                | 0.16 | 0.27 | 0.00 | 0.29                                         | 0.23 | 0.21 | 0.00 | 0.05                                        | 0.19 | 0.18 |
|                                            | Biodiversity          | 0.40                                | 0.12 | 0.22 | 0.38 | 0.25                                         | 0.32 | 0.10 | 0.47 | 0.37                                        | 0.14 | 0.39 |
|                                            | Primary production    | 0.29                                | 0.11 | 0.25 | 0.20 | 0.25                                         | 0.26 | 0.15 | 0.00 | 0.21                                        | 0.15 | 0.29 |
| National                                   | Life expectancy       | +                                   | --   | -    | --   | +                                            | +    | -    | +    |                                             |      | +    |
|                                            | Gini index            | -                                   | +    | -    | +    |                                              |      |      | +    |                                             | +    |      |
|                                            | POP Density           | -                                   | +    | -    | +    |                                              | -    | +    |      | +                                           | -    | --   |
|                                            | Forest                | +                                   | -    | -    | +    | -                                            | +    | ++   | ++   |                                             |      |      |
| Individual                                 | Income class          |                                     |      |      |      |                                              | +    |      |      |                                             |      |      |
|                                            | Subjective well-being |                                     |      |      | --   |                                              |      |      | --   | --                                          |      |      |

This table illustrates the group shares and the type of people that tend to belong to each group. + and - indicate significantly positive and negative observed correlations, while ++ and -- indicate stronger correlations. Shading indicates no significant correlations are observed between the classifications and the respondents' attributes. Overall, longer life expectancy is correlated to the probability of belonging to the class with higher weight on biodiversity (A1, M1, M2, M4, H3); shorter life expectancy and larger domestic income inequality (Gini index) are correlated to the probability of belonging to the class with higher weight on human health (A2, A4, M3, M4, H2). The household income class (relative income level within the region) is significantly correlated to higher social weighting on biodiversity (M2) among the middle-income countries, despite having no significant impact on segmentation for the high-income countries.
